# Supplementary material
Source: Springer Nature journal article supplement (https://www.springermedizin.de/resource/supplementary/12885_2012_3876_MOESM1_ESM.pdf/9464676)

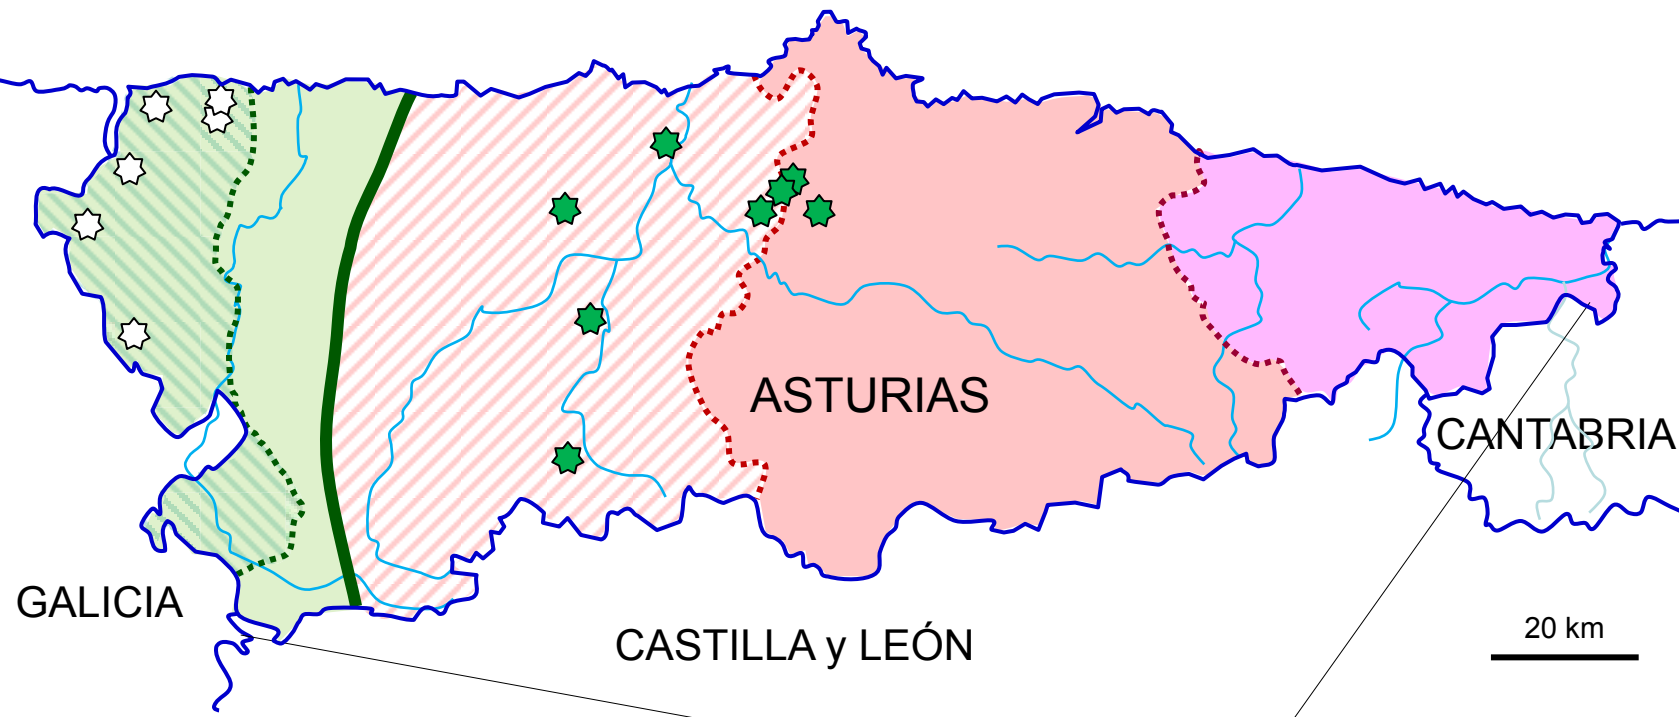

★ *BRCA1* c.2900\_2901dupCT, p.Pro968Leufs

☆ *BRCA2* c.4030\_4035delinsC, p.Asn1344Hisfs

 *Eonavian dialect region*

 *Transhumance central region*

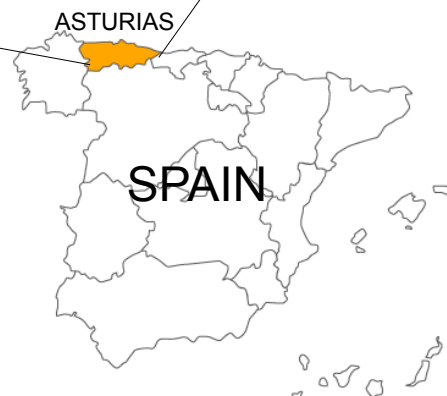

Supplement: MOESM1 [file 9464676]
